# Supplementary material for: Photothermal coupling electrolysis on Ni–W–B toward practical overall water splitting
Source: Royal Society of Chemistry journal article supplement (doi:10.1039/c9ta02863c), 2019-01-01
Supplement: c9ta02863c1.pdf [file c9ta02863c1.pdf]

## Supporting Information for

### **Photothermal Coupling Electrolysis on Ni-W-B Toward Practical Overall Water Splitting**

Weiju Hao,<sup>a</sup> Renbing Wu,<sup>\*a</sup> Hongyuan Yang,<sup>a</sup> and Yanhui Guo<sup>\*a</sup>

Dr. W. Hao, Prof. R. Wu, H. Yang, Prof. Y. Guo

<sup>a</sup>Department of Materials Science, Fudan University, Shanghai 200433, P. R. China

\*E-mail: rbwu@fudan.edu.cn; gyh@fudan.edu.cn

### **Experimental Section**

#### **Materials**

Nickel sulfate ( $\text{NiSO}_4 \cdot 6\text{H}_2\text{O}$ , AR), dimethyl ammonium borane (DMAB, AR), sodium sulfate ( $\text{Na}_2\text{SO}_4$ , AR), sodium succinate (AR), sodium tungstate ( $\text{Na}_2\text{WO}_4 \cdot 2\text{H}_2\text{O}$ , AR) were purchased from Sigma-Aldrich Chemical Reagent. Acetone (AR, 99.5%), ethanol (AR, 99.5%), nitric acid ( $\text{HNO}_3$ , AR), sulfuric acid ( $\text{H}_2\text{SO}_4$ , AR), Dipotassium phosphate ( $\text{K}_2\text{HPO}_4$ , AR), Potassium dihydrogen phosphate ( $\text{KH}_2\text{PO}_4$ , AR) and potassium hydroxide (KOH, AR) were bought from Aladdin. Carbon cloth (CC) about 0.1 mm in thickness was purchased from Shanghai Metal Company. Pt/C (10 wt% Pt),  $\text{IrO}_2$  and Nafion (5 wt%) were purchased from Sigma-Aldrich Chemical Reagent. Water was ultrapure water which was purified through a Millipore system. All chemicals were used as received without further purification.

#### **Preparation of Ni-W-B /CC electrode**

In a typical preparation, Sodium sulfate ( $\text{Na}_2\text{SO}_4$ , 1.5 g) and sodium succinate (2.5 g) were dissolved in 100 mL water and stirred at 450 rpm  $\text{min}^{-1}$ . After 30 min, the Nickel sulfate hexahydrate ( $\text{NiSO}_4 \cdot 6\text{H}_2\text{O}$ , 2.5 g) was added and the solution system became a stability of

metal complexes. Then the dimethyl ammonium borane (DMAB, 0.72 g) and sodium tungstate dihydrate ( $\text{Na}_2\text{WO}_4 \cdot 2\text{H}_2\text{O}$ , 0.157 g) were dispersed in the system and dissolved completely. 100 mL of the solution was divided into 5 equal and filled into beaker for later use. A piece of carbon cloth (CC, 1 cm  $\times$  0.5 cm) was treated with dilute nitric acid at 90 °C for 12 h and then cleaned by water and ethanol. The cleaned CC was immersed into the pre-prepared solution. The electroless plating of CC was maintained at room temperature (25 °C) for 30 min, 60 min, 90 min, 120 min and 150 min. At last, the roughness of the surface of Ni-W-B/CC was prepared (5.6 mg cm<sup>-2</sup>) for the best performance (Fig. S1, Supporting information).

### **Characterizations**

X-ray diffractometer (XRD) was acquired on a Rigaku D/MAX 2550 with Cu K $\alpha$  radiation. Scanning electron microscopic (SEM) measurements were performed on a HitachiS-4800 field at an accelerating voltage of 20 kV. Transmission electron microscopy (TEM, JEOL Ltd., JEM-2100F) was employed to analyze the microstructure of a single Ni-W-B catalyst. X-ray photoelectron spectrometer (XPS) data were collected on an ESCALABMK II using Mg as the exciting source. The binding energy was calibrated by means of the C 1s peak energy of 284.6 eV. Inductively coupled plasma atomic emission spectroscopy (ICP-AES) analysis was performed on Model ARCOS FHS12 (SPECTRO Analytical Instruments Inc, Germany). Light (the intensity of light was about 0.75 W cm<sup>-2</sup>) was supplied by a Xenon lamp (LSP-X500 Arc lamp), the intensity of light was detected by the Solar Power Meter (SM206-SOLAR).

### **PTE experimental work process**

All photothermal effect (PTE) measurements were performed in a three electrode mode with a photothermal catalyst (Ni-W-B/CC), a carbon rod and an Ag/AgCl as the working, counter and reference electrode within a transparent glass beaker. 1.0 M KOH (0.5 M phosphate

buffer saline (PBS) and 0.5 M H<sub>2</sub>SO<sub>4</sub>) aqueous solution was used as the electrolyte. All Ni-W-B/CC electrodes were illuminated from the front side using a Xenon lamp (LSP-X500 Arc lamp) to simulate the solar spectrum. The light intensity was calibrated to 0.75 W cm<sup>-2</sup> by a convex lens (Conventional type, Diameter =10 cm) during the electrochemical test.

### Electrochemical Measurements

Linear-sweep voltammetry (LSV) curves were recorded from a CHI760E electrochemical workstation (Chenhua, Shanghai). A three-electrode cell system was employed using a Ni-W-B/CC (CC: 0.5 cm<sup>2</sup>) as working electrode, a carbon rod as the counter-electrode and saturated calomel electrode as reference electrode. In all measurements, the saturated calomel electrode reference electrode was calibrated with respect to the RHE. LSV measurements were conducted in 1.0 M KOH, 0.5 M PBS or 0.5 M H<sub>2</sub>SO<sub>4</sub> at a scan rate of 5 mV S<sup>-1</sup> without *iR*-correction. All potentials reported were calibrated to the RHE. In 1.0 M KOH (0.5 M PBS or 0.5 M H<sub>2</sub>SO<sub>4</sub>),  $E(\text{RHE}) = E(\text{SCE}) + 0.245 \text{ V} + 0.0596 \text{ pH}$ , where  $E$  was the potential of the electrode<sup>1</sup>. For comparison, the working electrodes using Pt-C/CC and IrO<sub>2</sub>/CC were also investigated. In the preparation of Pt/C electrode, 5 mg Pt-C, 30 μL nafion solution and 970 μL ethanol were mixed and ultrasounding for 30 min. An aliquot of 10 μL was pipetted onto the CC (0.5 cm<sup>2</sup>) for several times to reach a catalyst loading about 5.6 mg cm<sup>-2</sup>. IrO<sub>2</sub>/CC was prepared using the same method and the results of overpotential were also not *iR*-corrected. The stability of a catalyst was carried by chronopotentionmetry at a constant potential or current density, the time was 20 h at the current density.

### Electrochemical Surface Area (ECSA) Determination

The double-layer capacitance ( $C_{dl}$ ), which is in proportion to ECSA,<sup>2</sup> was obtained by deriving from the cyclic voltammetry (CV) curves versus the scan rates. The potential was swept between 0.05 and 0.17 V versus RHE at five different scan rates (5, 25, 45, 65 and 85 mV s<sup>-1</sup>) for HER. The potential was swept between 0.70 and 0.86 V versus RHE at eight

different scan rates (5, 25, 45, 65 and 85 mV s<sup>-1</sup>) for OER. The measured C<sub>dl</sub> are plotted as a function of scan rate. The C<sub>dl</sub> of HER for Ni-W-B/CC and Ni-W-B/CC (PTE) are determined as 115.1 mF cm<sup>-2</sup>, and 135.2 mF cm<sup>-2</sup>, respectively (Fig. S13, Supporting information). The C<sub>dl</sub> of OER for Ni-W-B/CC and Ni-W-B/CC (PTE) were determined as 39.1 mF cm<sup>-2</sup> and 41.1 mF cm<sup>-2</sup>, respectively (Fig. S14, Supporting information).

The remarkably improved activity at high temperature during the water splitting can be analyzed as following:<sup>3</sup>

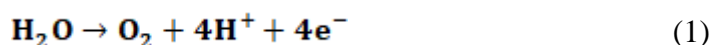

$$\mathbf{\Delta G = \Delta H - T\Delta S} \quad (2)$$

$$\mathbf{E_{rev} = -\frac{\Delta G}{2F}} \quad (3)$$

$$\mathbf{E_{rev} = 1.23 - 0.9 \times 10^{-3} (T - 298)} \quad (4)$$

$$\mathbf{E_{Nernst} = E_{rev} + \frac{RT}{4F} \ln[(H^+)^4 P_{O_2}]} \quad (5)$$

$$\mathbf{\Delta E = (0.9 \times 10^{-3} + 1.99 \times 10^{-4} PH)\Delta T} \quad (6)$$

Eq (1): The thermodynamics of the water oxidation reaction is altered by the elevating temperature;

Eq (2): The Gibbs free energy ( $\Delta G$ ) is mathematically expressed, where  $\Delta H$  is the enthalpy and  $\Delta S$  is the entropy of the reaction;

Eq (3): The reversible potential ( $E_{rev}$ ) based on the Gibbs free energy is given by, where  $F$  is the Faraday constant.

Eq (4): Considering that Gibbs free energy is temperature dependent, an empirical expression of the reversible potential for water oxidation has been reported to model this behavior.

Eq (5): Influenced by the concentration of the reactants and products, the reversible potential is evolved to give the Nernst potential ( $E_{Nernst}$ );

Eq (6): the change of Nernst potential resulting from the elevated temperature of electrolyte system.

In this work, substituting pH 14 in eq (6) results in a slope of  $-3.686 \text{ mV } ^\circ\text{C}^{-1}$  which was the temperature coefficient of the water oxidation reaction attributed to thermodynamics.

The experimental temperature coefficient ( $-3.790 \text{ mV } ^\circ\text{C}^{-1}$ , Fig. 3e and 3f) of the onset potential of the Ni-W-B/CC was substantially similar to the equation ( $-3.686 \text{ mV } ^\circ\text{C}^{-1}$ ). In fact, the temperature of the electrolyte only increased by  $0.9 \text{ } ^\circ\text{C}$  (Fig. S9, Supporting information), corresponding to an overpotential reduction of  $3.411 \text{ mV}$  for Ni-W-B/CC electrode operated at the elevated temperature of electrolyte. However, the overpotential was decreased by  $39 \text{ mV}$  at the current density of  $100 \text{ mA cm}^{-2}$  under PTE deduced from the thermodynamic change of the water oxidation reaction.

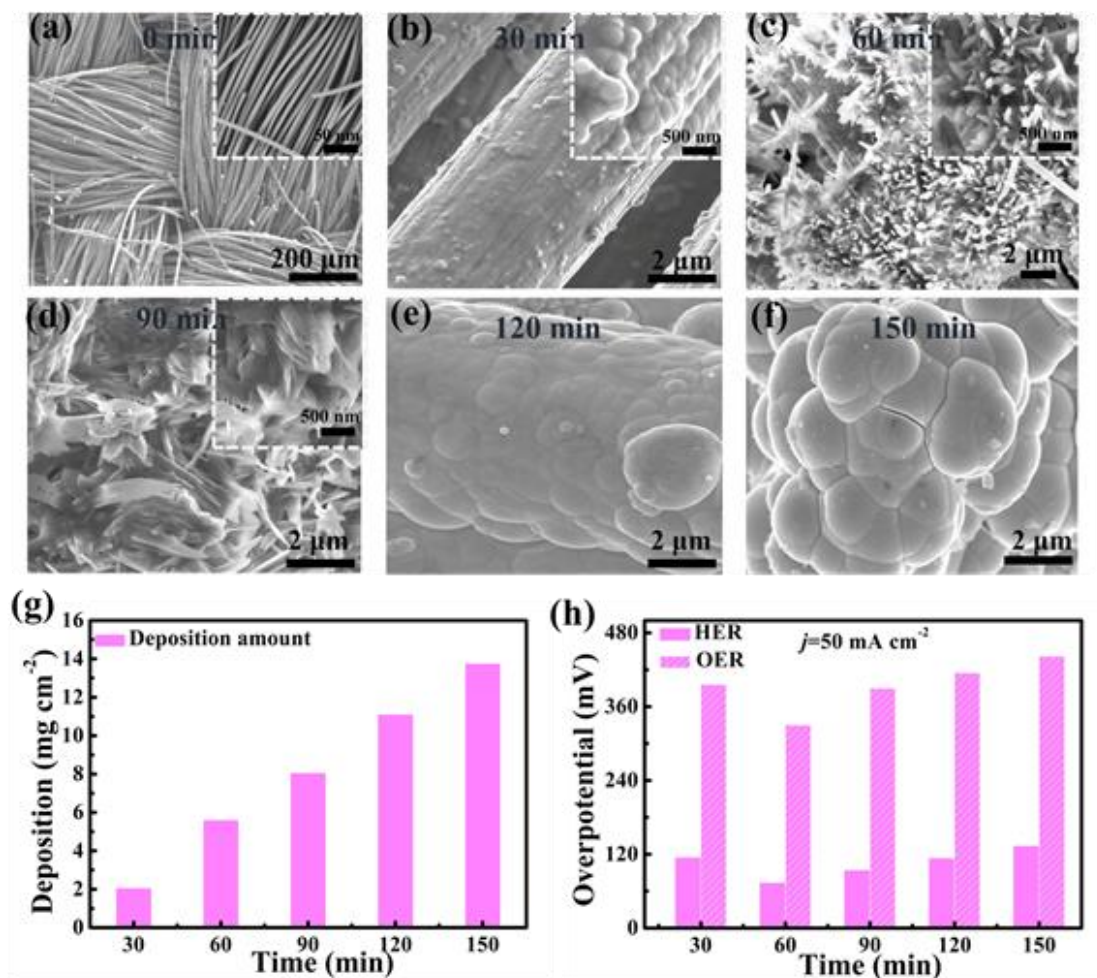

**Figure S1.** FESEM images of Ni-W-B/CC electrode during its formation process at 25 °C (a-f), the amount of catalyst deposited on the CC substrate (g) and the overpotentials of HER and OER for the Ni-W-B/CC electrode at different time.

**Table S1.** ICP-AES analysis on the Ni-W-B/CC electrode.

| Catalysts | ICP-AES (wt%) |      |      | Atomic ratio |
|-----------|---------------|------|------|--------------|
|           | Ni            | W    | B    | Ni:W:B       |
| Ni-W-B    | 84.81         | 6.38 | 2.38 | 6.5:0.16:1   |
| Post-HER  | 82.42         | 6.33 | 2.10 | 7.2:0.18:1   |
| Post-OER  | 83.11         | 6.14 | 1.98 | 7.7:0.18:1   |

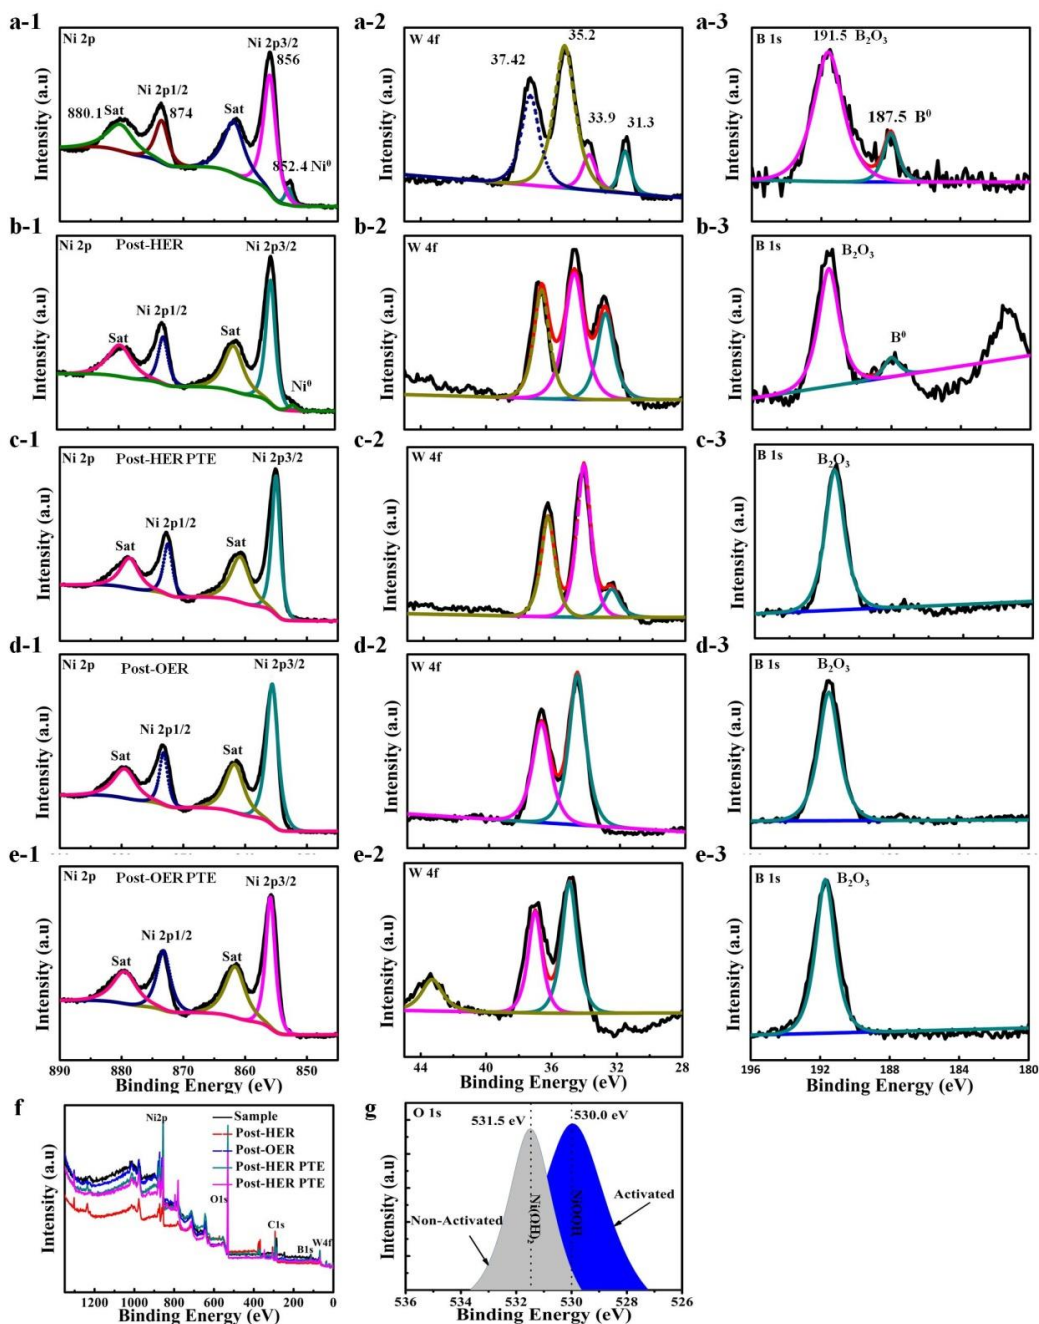

**Figure S2.** (a-1, a-2 and a-3) Ni 2p, W 4f and B 1s core-level XPS spectra of Ni-W-B/CC, respectively. (b-1, b-2 and b-3) XPS spectra for the post-HER of Ni-W-B/CC in the Ni 2p, W 4f and B 1s. (c-1, c-2 and c-3) post-HER with PTE of Ni-W-B/CC in the Ni 2p, W 4f and B 1s. (d-1, d-2, d-3) XPS spectra for the post-OER Ni-W-B/CC with PTE. (e-1, e-2, e-3) XPS spectra for the post-OER of Ni-W-B/CC with PTE. (f) XPS survey spectrum of Sample, Post-HER, Post-OER and Post-HER (PTE), Post-OER (PTE) of Ni-W-B/CC. (g) O 1s high-resolution spectra of Ni-W-B/CC before and post-OER with PTE.

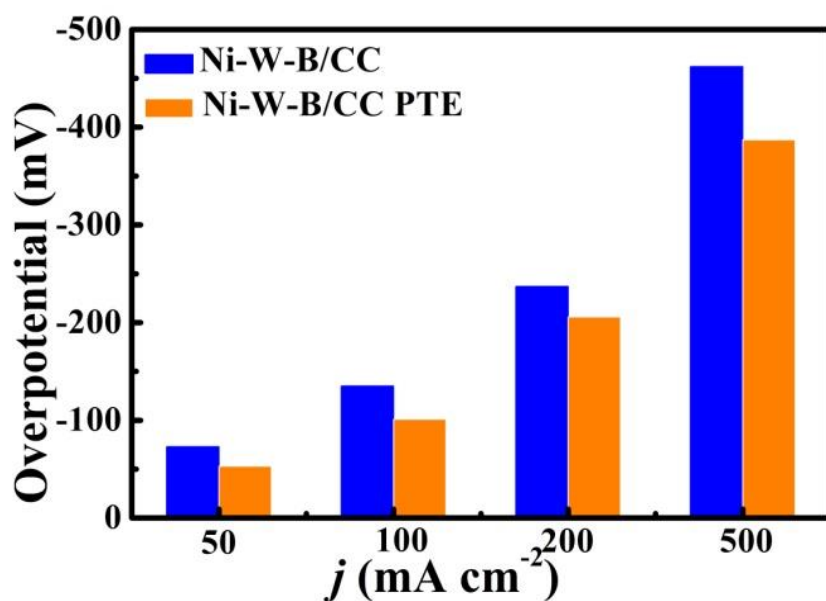

**Figure S3.** Overpotentials of Ni-W-B/CC and PTE-promoted Ni-W-B/CC for HER at current densities of 50, 100, 200 and 500 mA cm<sup>-2</sup>.

**Table S2.** Comparison of the HER performances of Ni-W-B/CC with other state-of-the-art electrocatalysts in 1.0 M KOH.

| Catalysts                                             | $j$ (mA cm <sup>-2</sup> ) | $\eta$ (HER: mV) | Reference |
|-------------------------------------------------------|----------------------------|------------------|-----------|
| Ni-W-B/CC                                             | 50/100                     | 73/136           | This work |
| Ni-W-B/CC(PTE)                                        | 50/100                     | 53/101           |           |
| CoP NWs/CC                                            | 100                        | 180              | 4         |
| Ni <sub>1-x</sub> Co <sub>x</sub> Se <sub>2</sub> /NF | 10                         | 85               | 5         |
| Se-(NiCo)S <sub>x</sub> /(OH) <sub>x</sub> /NF        | 10                         | 103              | 6         |
| Co-Ni <sub>3</sub> N                                  | 40                         | 220              | 7         |
| FeB <sub>2</sub> /NF                                  | 10                         | 61               | 8         |
| CoPS/NF                                               | 10                         | 48               | 9         |
| Ni <sub>2</sub> P/Fe <sub>2</sub> P-NF                | 10                         | 121              | 10        |
| Co-W-B/NF                                             | 10                         | 90               | 11        |
| FeS <sub>2</sub> /CoS <sub>2</sub>                    | 10                         | 78               | 12        |



|                                            |     |      |    |
|--------------------------------------------|-----|------|----|
| NiP/NF                                     | 10  | 42   | 13 |
| Fe-Ni@NC-CNTs                              | 145 | 202  | 14 |
| MoP/NF                                     | 10  | 110  | 15 |
| CoP/Ni <sub>5</sub> P <sub>4</sub> /CoP/NF | 10  | 71   | 16 |
| FeCoNi-HNTAs/NF                            | 10  | 58   | 17 |
| Ni <sub>2</sub> P-NiP <sub>2</sub> /NF     | 10  | 59.7 | 18 |
| NiFe NTAs-NF                               | 10  | 181  | 19 |
| NiFeSP/NF                                  | 10  | 91   | 20 |

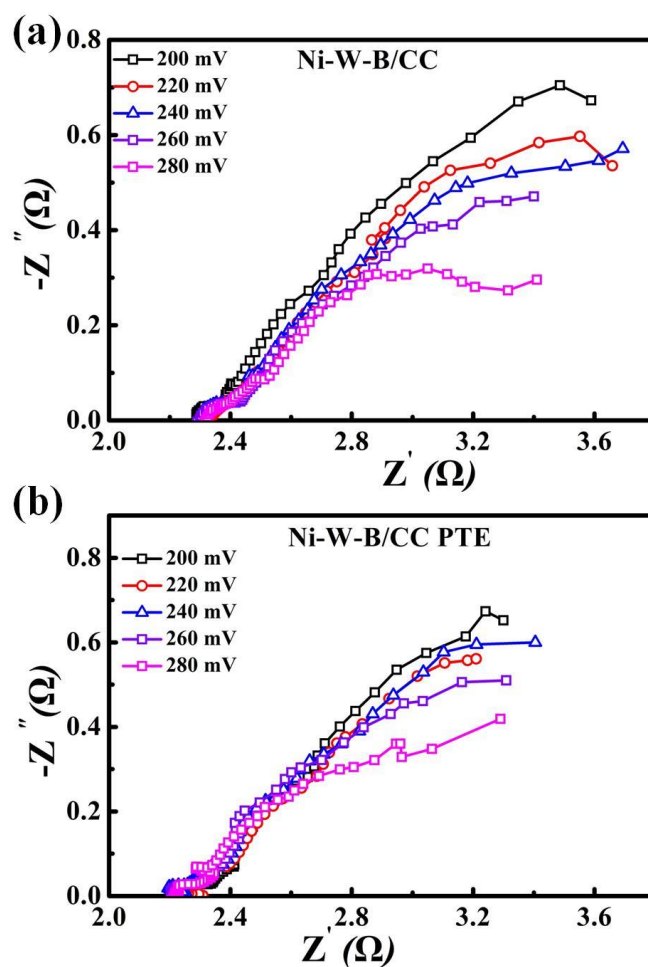

**Figure S4.** Electrochemical impedance spectroscopy of Ni-W-B/CC (a) and Ni-W-B/CC with PTE (b) for HER.

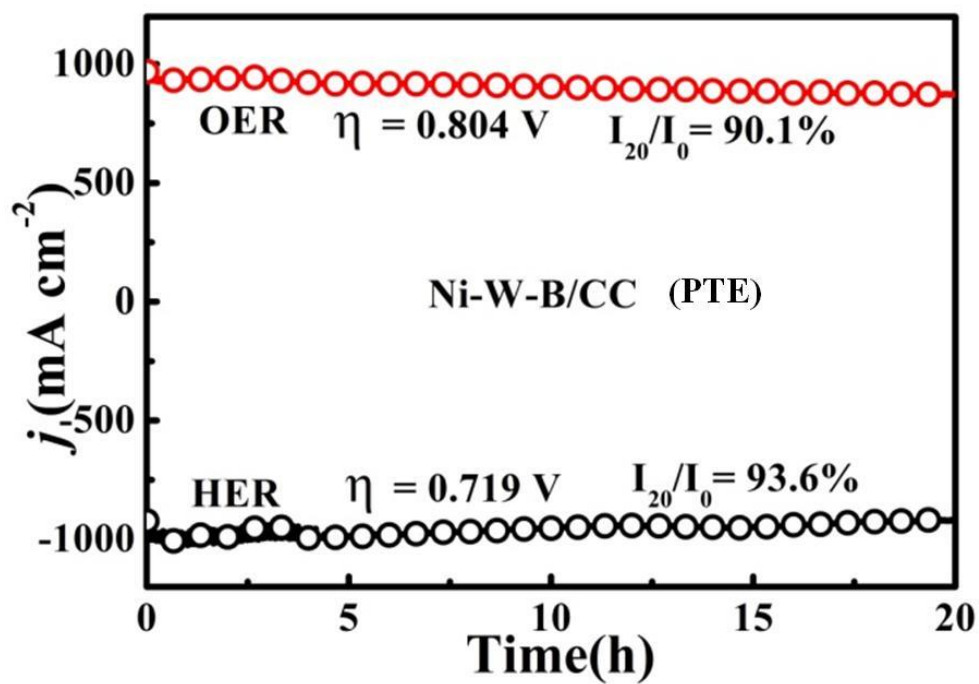

**Figure S5.** Long-term stability test of Ni-W-B/CC at current density of  $1000 \text{ mA cm}^{-2}$  for HER and OER in 1 M KOH over 20 h with PTE.

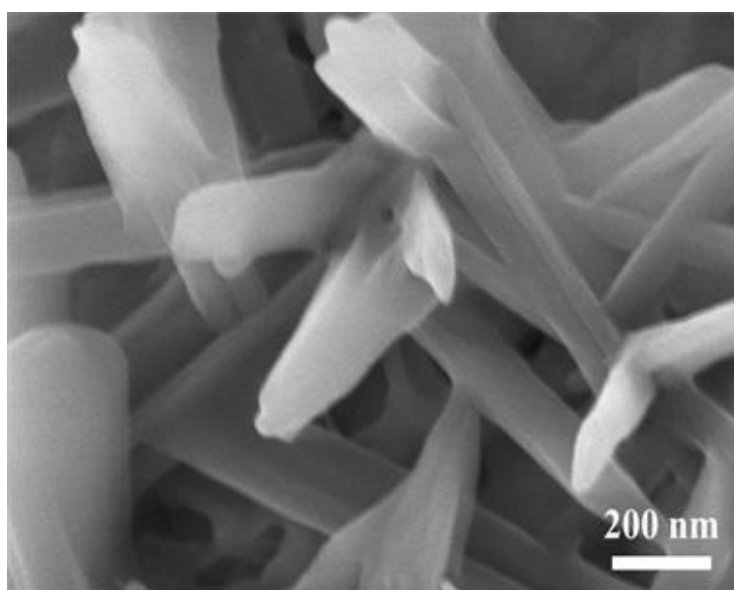

**Figure S6.** SEM image of post-HER Ni-W-B/CC (PTE) for 20 h.

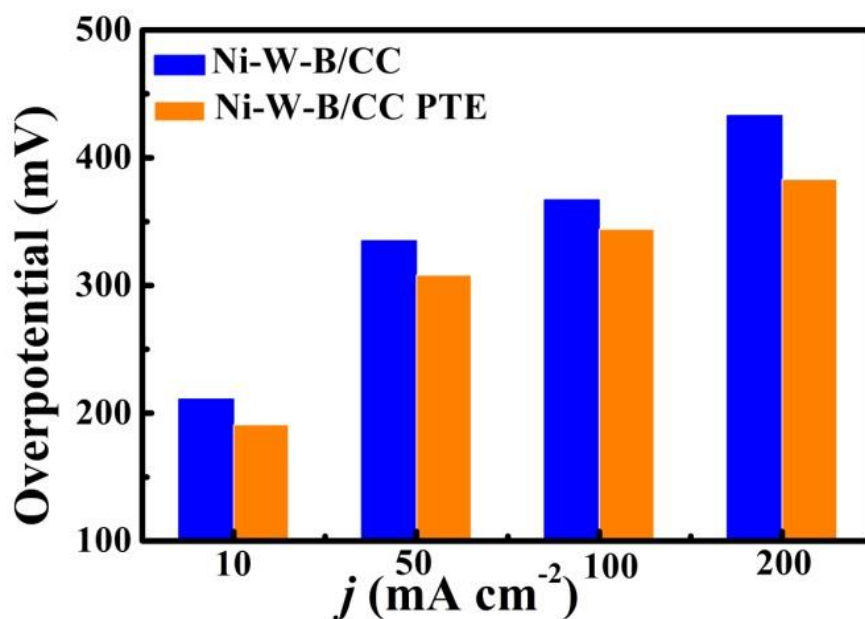

**Figure S7.** Required overpotentials at a current density of 10, 50, 100 and 200 mA cm<sup>-2</sup> for OER.

**Table S3.** Comparison of OER performance in 1.0 M KOH for Ni-W-B/CC with other non-noble-metal electrocatalysts.

| Catalyst                           | $j$<br>(mA cm <sup>-2</sup> ) | $\eta$ (OER.mV) | Reference |
|------------------------------------|-------------------------------|-----------------|-----------|
| Ni-W-B/CC                          | 10/50/100                     | 211/332/367     | This work |
| Ni-W-B/CC(PTE)                     | 10/50/100                     | 191/302/344     |           |
| Ni(BDC) @NF                        | 10                            | 265             | 21        |
| Fe-Doped Ni <sub>2</sub> P         | 10                            | 230             | 22        |
| Co-MoS <sub>2</sub> /NF            | 10                            | 260             | 23        |
| CoNiO <sub>2</sub>                 | 10                            | 210             | 24        |
| Fe-Co-NiSe <sub>2</sub>            | 10                            | 251             | 25        |
| WO <sub>2</sub> HN/NF              | 10                            | 300             | 26        |
| Co <sub>9</sub> S <sub>8</sub> /GC | 10                            | 302             | 27        |

|                                               |    |     |    |
|-----------------------------------------------|----|-----|----|
| Co <sub>5.47</sub> N-NP@N-PC                  | 10 | 248 | 28 |
| Fe-doped NiCr <sub>2</sub> O <sub>4</sub> /NF | 10 | 228 | 29 |
| Fe(TCNQ) <sub>2</sub> nanowire                | 10 | 340 | 30 |
| Co-M-P-NS                                     | 10 | 209 | 31 |
| MnO <sub>2</sub> -CoP <sub>3</sub>            | 10 | 280 | 32 |
| F <sub>0.25</sub> C <sub>1</sub> CH/NF        | 10 | 228 | 33 |
| Fe-CoP/Ti mesh                                | 10 | 230 | 34 |
| NixB/NF                                       | 10 | 280 | 1  |
| NiCoP/NF                                      | 10 | 280 | 35 |
| Ni <sub>2</sub> P/NF                          | 10 | 277 | 36 |
| Ni/Mo <sub>2</sub> C-PC                       | 10 | 368 | 37 |

---

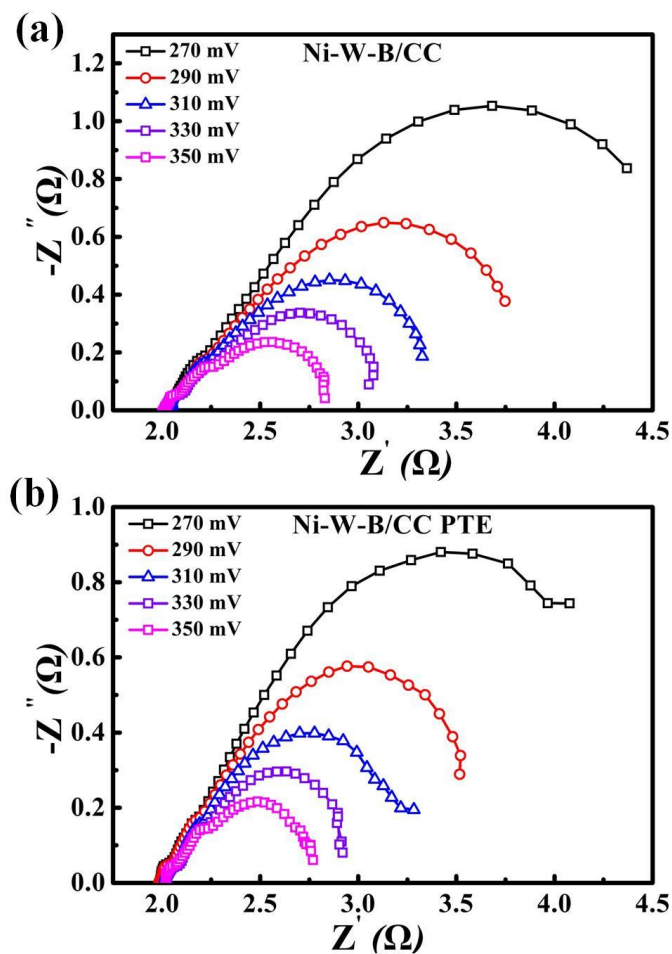

**Figure S8.** Electrochemical impedance spectroscopy of Ni-W-B/CC (a) and Ni-W-B/CC with PTE(b) for OER.

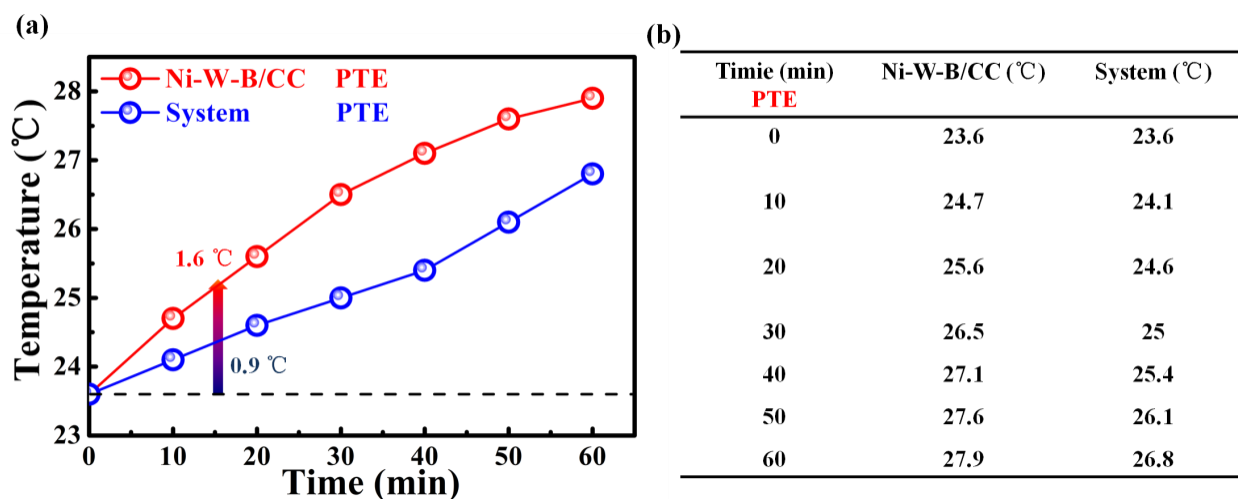

**Figure S9.** (a) and (b) The temperature changes of system, electrolyte close to the Ni-W-B/CC under PTE.

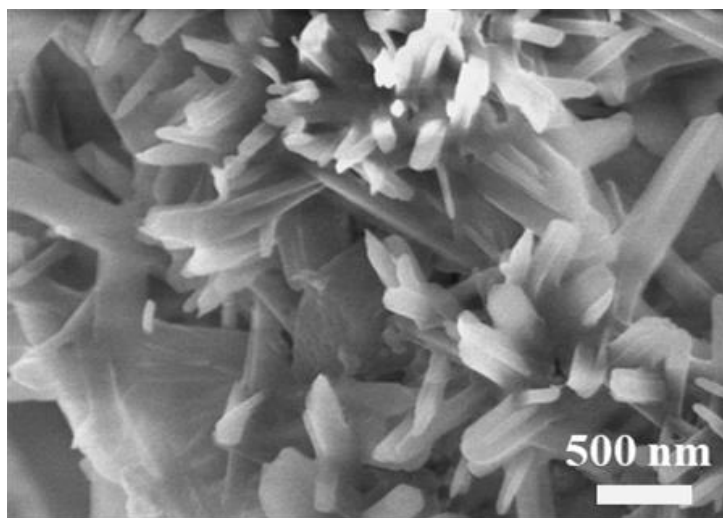

**Figure S10.** SEM image of post-OER (PTE) Ni-W-B/CC for 20 h.

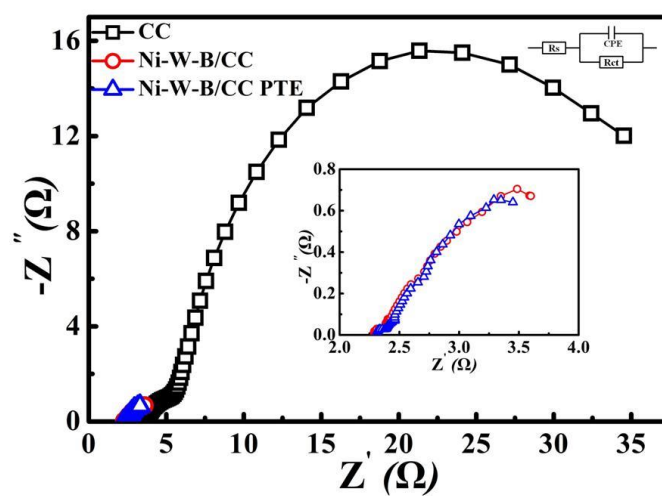

**Figure S11.** Nyquist plots of CC and Ni-W-B/CC measured at overpotential of 200 mV for HER.

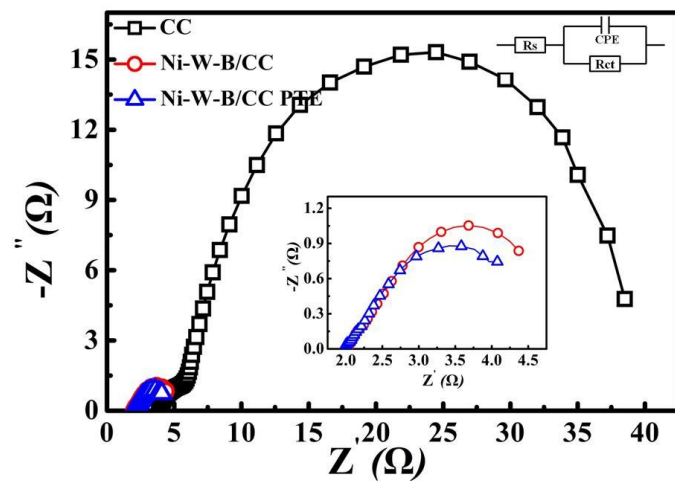

**Figure S12.** Nyquist plots of CC and Ni-W-B/CC measured at overpotential of 270 mV for OER.

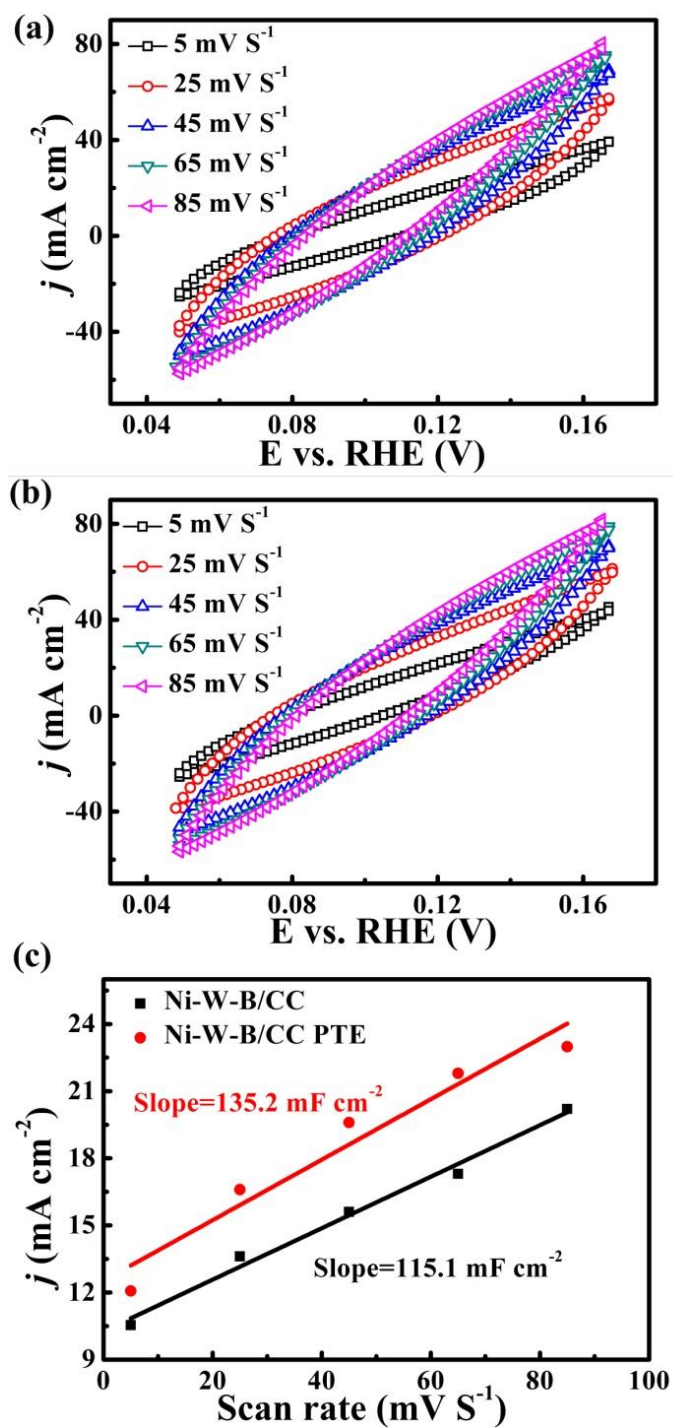

**Figure S13.** Electrochemical capacitance measurements to determine the surface area of the obtained electrodes in 1 M KOH for HER. The capacitive current density on (a) Ni-W-B/CC, (b) Ni-W-B/CC PTE from double layer charging can be measured from cyclic voltammograms in a potential range where no Faradic reaction occur. (c) The measured capacitive current plotted as a function of scan rate at 0.10 V vs. RHE.



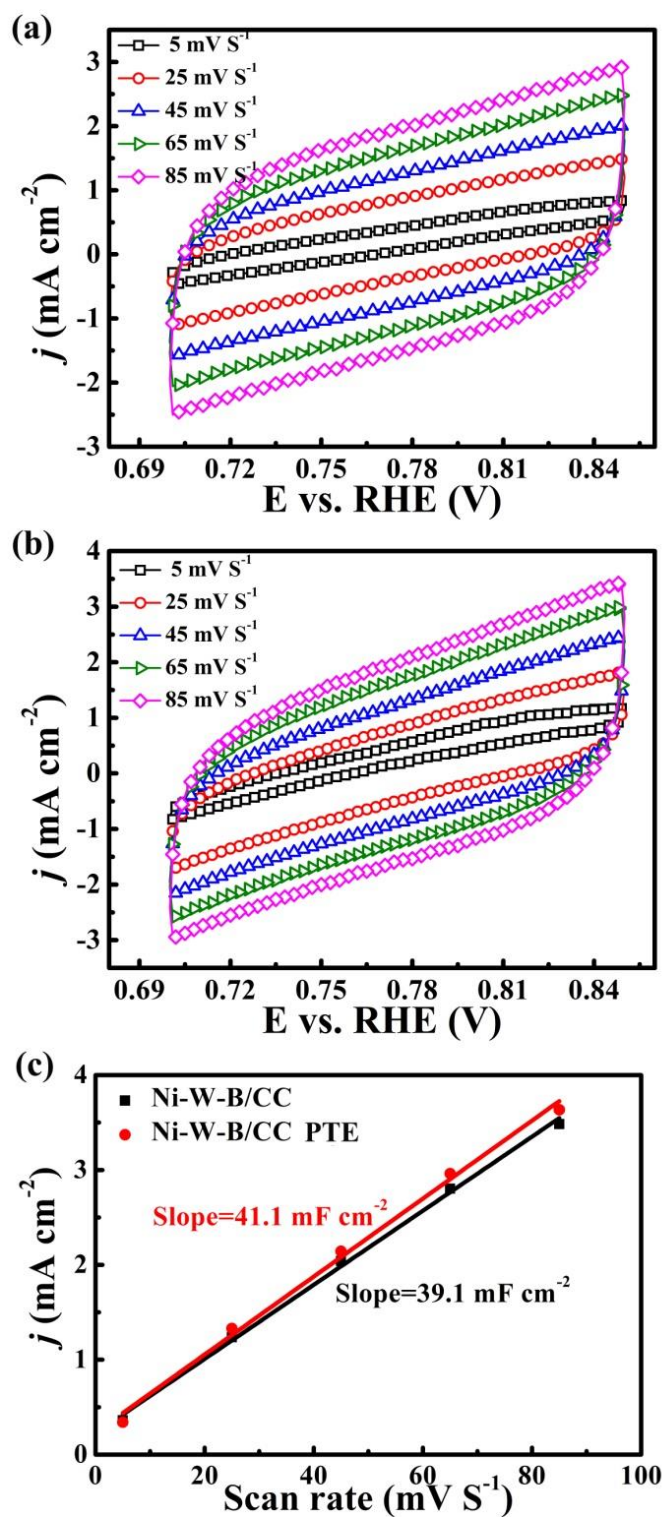

**Figure S14.** Electrochemical capacitance measurements to determine the surface area of the obtained electrodes in 1 M KOH for OER. The capacitive current density on a) Ni-W-B/CC, b) Ni-W-B/CC PTE from double layer charging can be measured from cyclic voltamograms at scan rates from 5 to 85 mV s<sup>-1</sup> in a potential range where no Faradic reaction occur. c) The measured capacitive current plotted as a function of scan rate at 0.78 V vs. RHE.

**Table S4.** Comparison of overall water splitting performance in 1.0 M KOH for Ni-W-B/CC with other non-noble-metal electrocatalysts.

| Catalyst                                  | $j$ (mA cm <sup>-2</sup> ) | Voltages (V) | Reference |
|-------------------------------------------|----------------------------|--------------|-----------|
| Ni-W-B/CC                                 | 25                         | 1.631        | This work |
|                                           | 100                        | 1.794        |           |
| Ni-W-B/CC (PTE)                           | 25                         | 1.524        |           |
|                                           | 100                        | 1.678        |           |
| NC-NiCu-NiCuN                             | 10                         | 1.56         | 38        |
| NiFeSP/NF                                 | 10                         | 1.58         | 20        |
| N-Ni <sub>3</sub> S <sub>2</sub> /NF      | 10                         | 1.48         | 39        |
| Fe,Co-NiSe <sub>2</sub> /CF               | 10                         | 1.52         | 40        |
| Ni-Mo-O/CC                                | 10                         | 1.54         | 41        |
| CoSn <sub>2</sub> /NF                     | 10                         | 1.55         | 42        |
| 2D LMH(M □□Ni,<br>Fe, Co, NiFe, and NiCo) | 10                         | 1.55         | 43        |
| NiFeSP/NF                                 | 10                         | 1.58         | 44        |
| CoOx@CN                                   | 10                         | 1.55         | 45        |
| CoMnCH/NF                                 | 10                         | 1.68         | 46        |
| CoP/NCNHP                                 | 10                         | 1.64         | 47        |
| Pt-CoS <sub>2</sub> /CC                   | 10                         | 1.55         | 48        |
| G-Ni <sub>4</sub> Fe/GF                   | 10                         | 1.58         | 49        |
| Mo <sub>2</sub> C-PC/NF                   | 10                         | 1.66         | 50        |

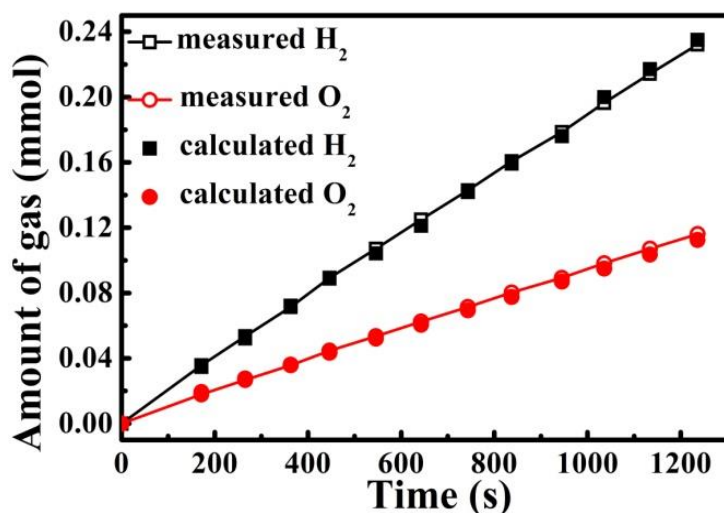

**Figure S15.** Amount of gas theoretically calculated and experimentally measured versus time for Ni-W-B/CC||Ni-W-B/CC with PTE.

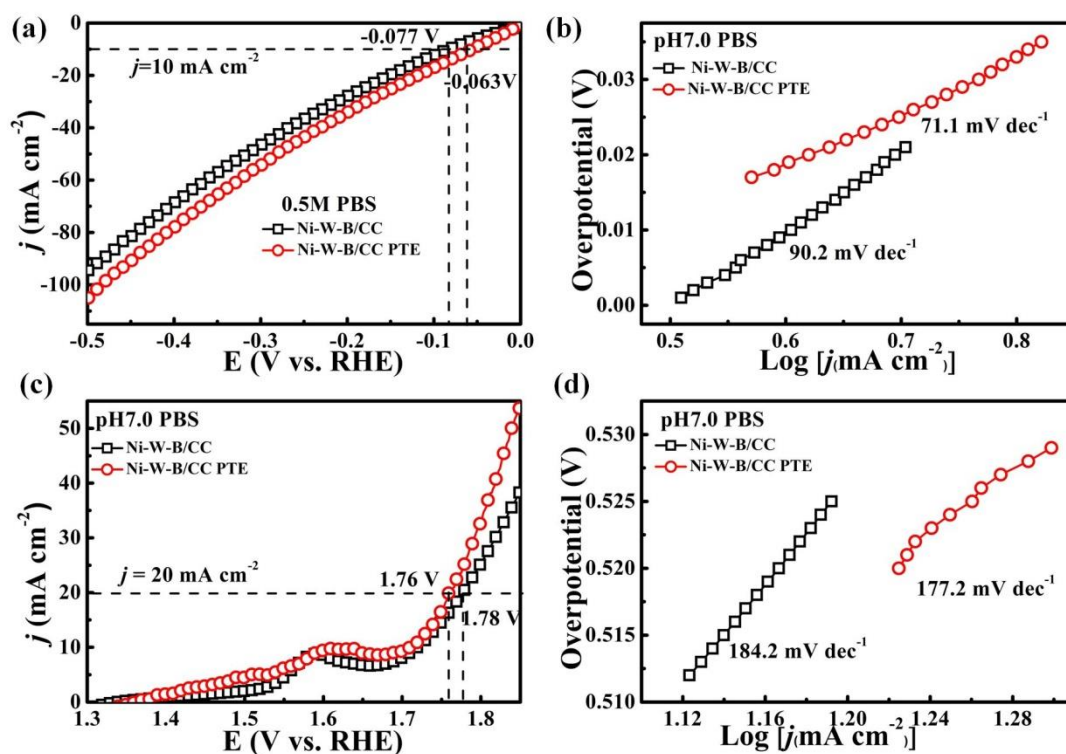

**Figure S16.** (a) HER polarization curves and (b) Tafel slope of Ni-W-B/CC electrode and Ni-W-B/CC electrode with PTE in 0.5 M PBS (pH = 7.0). (c) OER polarization curves and (d) Tafel slope of Ni-W-B/CC electrode and Ni-W-B/CC electrode with PTE in 0.5 M PBS (pH = 7.0).

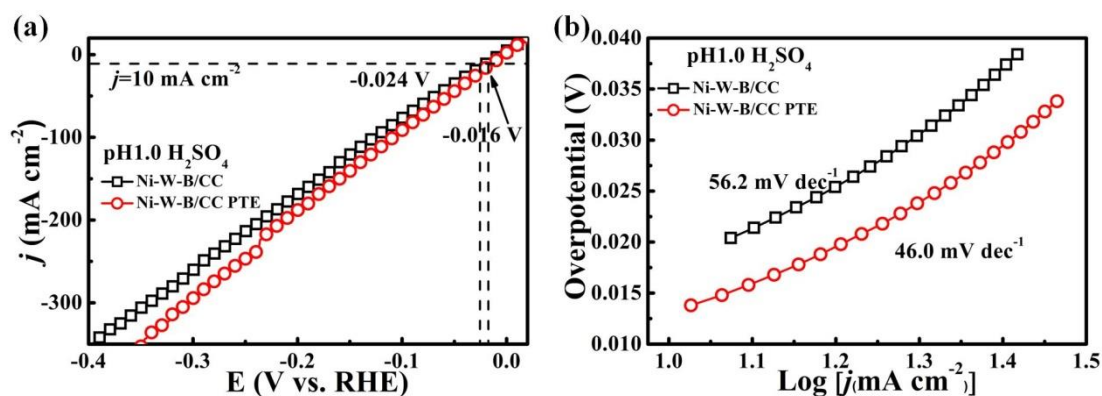

**Figure S17.** (a) HER polarization curves and (b) Tafel slope of Ni-W-B/CC electrode and Ni-W-B/CC electrode with PTE in 0.5 M H<sub>2</sub>SO<sub>4</sub> (pH = 1.0).

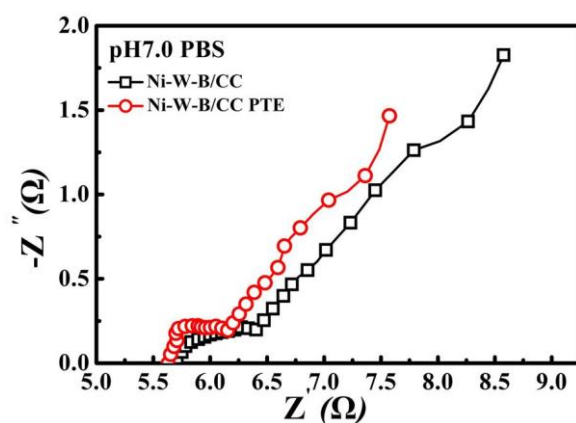

**Figure S18.** Nyquist plots of Ni-W-B/CC and Ni-W-B/CC (PTE) measured at overpotential of 150 mV for HER in 0.5 M PBS (pH 7.0).

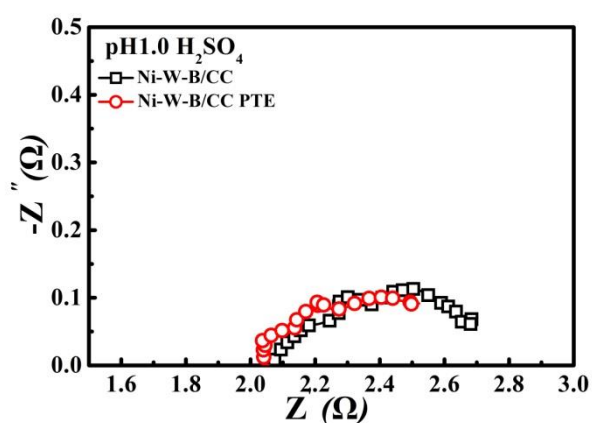

**Figure S19.** Nyquist plots of Ni-W-B/CC and Ni-W-B/CC (PTE) measured at overpotential of 150 mV for HER in 0.5 M H<sub>2</sub>SO<sub>4</sub> (pH 1.0).

## References

1. J. Masa, I. Sinev, H. Mistry, E. Ventosa, M. de la Mata, J. Arbiol, M. Muhler, B. R. Cueny and W. Schuhmann, *Adv. Energy Mater.*, 2017, **7**, 1700381.
2. L.A. Stern, F. Song and X.L. Hu, *Energy Environ. Sci*, 2015, **8**, 2347.
3. B.B Zhang, M. Cheng, L.Z. Fan and L. Sun, *Faraday Discuss.*, 2017, **198**, 169.
4. K. Xu, H. Cheng, H. Lv, J. Wang, L. Liu, S. Liu, X. Wu, W. Chu, C. Wu and Y. Xie, *Adv Mater*, 2018, **30**, 1705516.
5. B. Liu, Y. F. Zhao, H. Q. Peng, Z. Y. Zhang, C. K. Sit, M. F. Yuen, T. R. Zhang, C. S. Lee and W. J. Zhang, *Adv. Mater.*, 2017, **29**, 1606521.
6. C. Hu, L. Zhang, Z. J. Zhao, A. Li, X. Chang and J. Gong, *Adv. Mater.*, 2018, **30**, e1705538.
7. C. Zhu, A. L. Wang, W. Xiao, D. Chao, X. Zhang, N. H. Tiep, S. Chen, J. Kang, X. Wang, J. Ding, J. Wang, H. Zhang and H. J. Fan, *Adv. Mater.*, 2018, **30**, e1705516.
8. H. Li, P. Wen, Q. Li, C. Dun, J. Xing, C. Lu, S. Adhikari, L. Jiang, D. L. Carroll and S. M. Geyer, *Adv. Energy Mater.*, 2017, **7**, 1700513.
9. M. Cabán-Acevedo, M. L. Stone, J. R. Schmidt, J. G. Thomas, Q. Ding, H.-C. Chang, M.-L. Tsai, J.-H. He and S. Jin, *Nat. Mater.*, 2015, **14**, 1245.
10. Y. Ge, P. Dong, S. R. Craig, P. M. Ajayan, M. Ye and J. Shen, *Adv. Energy Mater.*, 2018, 1800484.
11. G.X. Cao, N. Xu, Z.J. Chen, Q. Kang, H.B. Dai and P. Wang, *ChemistrySelect*, 2017, **2**, 6187-6193.
12. Y.X. Li, L. An, M. Lu, K. Sun, Y.Q. Zhao, D.Q. Gao, F.Y. Cheng, and P. Xi, *Small*, 2018, **14**, 1801070.
13. P. Menezes, C. Panda, S. Loos, F. B. Bruns, C. Walter, M. Schwarze, X. Deng, H. Dau and M. Driess, *Energy Environ. Sci.*, 2018, **11**, 1287-1298.
14. X. Zhao, P. Pachfule, S. Li, J. R. J. Simke, J. Schmidt and A. Thomas, *Angew. Chem. Int. Ed.*, 2018, **57**, 8921-8926.
15. Y. Jiang, Y. Lu, J. Lin, X. Wang and Z. Shen, *Small Methods*, 2018, **2**, 1700369.
16. I. K. Mishra, J.Y. Sun, F. Qin, K. Dahal, and J.M. Bao, *Energy Environ. Sci*, 2018, DOI: 10.1039/c8ee01270a.
17. H. Li, S. Chen, Y. Zhang, Q. Zhang, X. Jia, L. Gu, X. Sun, L. Song and X. Wang, *Nat Commun*, 2018, **9**, 2452.
18. T. Liu, A. Li, C. Wang, W. Zhou, S. Liu and L. Guo, *Adv. Mater.*, 2018, e1803590.
19. L. Xu, J.H. Chen, X.Z. Fu, R. Sun, and C.P. Wong, *ACS Appl. Energy Mater.* , 2018, **1**, 1210-1217.

20. Y.M. Xin, L.Y. Gan, and Z.H.Zhang, *ACS Nano* 2018, **11**, 10303-10312.
21. H. Sun, Y. Lian, C. Yang, L. Xiong, P. Qi, Q. Mu, X. Zhao, J. Guo, Z. Deng and Y. Peng, *Energy Environ. Sci.*, 2018, **10**, 2363-2371.
22. Y. Li, H. Zhang, M. Jiang, Q. Zhang, P. He and X. Sun, *Adv. Funct. Mater.*, 2017, **27**, 1702513.
23. Q.Z Xiong, P.F. Liu, L.R. Zheng, G.Z Wang, *Adv. Mater.*, 2018, **30**, 1801450.
24. Y.Z. Jin, Z. Li, J.Q. Wang, R. Li, Z.Q. Li, H. Liu, J. Mao, *Adv. Energy Mater.*, 2018, **8**, 1703469.
25. Y.Q Sun, Z.X. Wei, H.L. Li, T. Zhang, X.Y. Li, W.P. Cai, and J.M. Ma, and Y. Li, *Adv. Mater.*, 2018, 1802121.
26. C. Shu, S. Kang, Y. Jin, X. Yue and P. K. Shen, *J. Mater. Chem. A*, 2017, **5**, 9655-9660.
27. Z. Chen, R. Wu, M. Liu, Y. Liu, S. Xu, Y. Ha, Y. Guo, X. Yu, D. Sun and F. Fang, *J. Mater. Chem.A*, 2018, **6**, 10304-10312.
28. Z. Chen, Y. Ha, Y. Liu, H. Wang, H. Yang, H. Xu, Y. Li and R. Wu, *ACS Appl Mater Interfaces*, 2018, **10**, 7134-7144.
29. J. Zhao, X. Li, G. Cui and X. Sun, *Chem. Commun.*, 2018, **54**, 5462-5465.
30. M. Xie, X. Xiong, L. Yang, X. Shi, A. M. Asiri and X. Sun, *Chem. Commun. (Camb.)*, 2018, **54**, 2300-2303.
31. X. Xiao, C.T. He, S. Zhao, J. Li, W. Lin, Z. Yuan, Q. Zhang, S. Wang, L. Dai and D. Yu, *Energy Environ. Sci.*, 2017, **10**, 893-899.
32. X. Xiong, Y. Ji, M. Xie, C. You, L. Yang, Z. Liu, A. M. Asiri and X. Sun, *Electrochem. Commun.*, 2018, **86**, 161-165.
33. L. Hui, Y. Xue, D. Jia, H. Yu, C. Zhang and Y. Li, *Adv. Energy Mater.*, 2018, 1800175.
34. C. Tang, R. Zhang, W. Lu, L. He, X. Jiang, A. M. Asiri and X. Sun, *Adv.Mater.*, 2017, **29**, 1602441-n/a.
35. P. W. Menezes, A. Indra, C. Das, C. Walter, C. Göbel, V. Gutkin, D. Schmeißer and M. Driess, *ACS Catalysis*, 2016, **7**, 103-109.
36. G. Read, J. F. Callejas, C. F. Holder and R. E. Schaak, *ACS Appl Mater Interfaces*, 2016, **8**, 12798-12803.
37. T. Wang, L. Wu, X. Xu, Y. Sun, Y. Wang, W. Zhong and Y. Du, *Sci. Rep.*, 2017, **7**, 11891.

38. J. Hou, Y. Sun, Z. Li, B. Zhang, S. Cao, Y. Wu, Z. Gao and L. Sun, *Adv. Funct. Mater.*, 2018, **28**, 1803278.
39. P.Z. Chen, M.X. Zhang, Y. Tong, C.G. Zhong, N. Zhang, and L.D. Zhang, and Y. Xie, *Adv. Mater.*, 2017, **29**, 1701584.
40. Y.Q. Sun, Z.X. Wei, H.L. Li, T. Zhang, X.Y. Li, W.P. Cai, and J.M. Ma, *Adv. Mater.*, 2018, 1802121.
41. A.P. Wu, Y. Xie, H. Ma, C.G. Tiana, Y. Gua, H.J. Yan, X.M. Zhang, and G.Y. Yang. *Nano Energy.*, 2018, **44**. 353–363.
42. C. P. Prashanth, W. Menezes, S. Garai, C. Walter, A. Guiet, and a. M. Driess, *Angew. Chem.*, 2018, **130**, 15457 –15462.
43. L. L. Zheng, S.G. Mo, D.H. Ou, J. Tao, R.X. Qin, and X.L. Fang, *Small.*, 2018, **14**, 1800759.
44. Y.M. Xin, L.Y. Gan, and Z.H. Zhang, *ACS Nano.*, 2017, **11**, 10303-10312.
45. J. W.Jin, D.F. Su, Z.Z.e Wei, Z.F. Pang, and Y. Wang, *J. A. Chem. Soc.*, 2015, **137**, 2688-2694.
46. Y.Y. Chen, S.F. Jin, and F. Gao, *J. A. Chem. Soc.*, 2017, **139**, 8320-8328.
47. K. Y. Pan, S.J. Liu, X. Cao, K.L. Wu, W.C. Cheong, and Y. Li, *J. A. Chem. Soc.*, 2018, **140**, 2610-2618.
48. X. W. Han, Y. Deng, J. Liu, J. Lu, C. Zhong, and W. Hu, *Adv. Energy Mater.*, 2018, **8**, 1800935.
49. M. Z. Yu, Y. Tong, C. Li, and G.Q. Shi, *Adv. Energy Mater.*, 2018, 1800403.
50. Y. D. Yu, M.R. Gao, C.C. Lang, Y.R. Zheng and S.H. Yu, *Chem. Sci*, 2017, **8**, 968–973.
